# Supplementary material for: Mechanical thrombectomy of acute ischemic stroke of Medium Sized Vessels (M2 segment of middle cerebral artery occlusion)
Source: Research Square preprint supplement (doi:10.21203/rs.3.rs-5253221/v1), 2024-11-01
Supplement: Supplementary file 1 [file f3251e39c12749f77542692b.docx]

**Table 1. Demographic, and risk factors among the 3 studied groups**

|  | **Mechanical thrombectomy**  **(n = 23)** | **Medical treatment** | | **P value** |
| --- | --- | --- | --- | --- |
| **rTPA (n = 23)** | **Conventional treatment (n = 28)** |
|  | Number (%) | Number (%) | Number (%) |  |
| Age (mean ±SD)  Median (IQR) | 59.7±9.758  60 (12) | 63.04±10.494  63 (14) | 59.64±13.130  63.50 (17) | 0.658 |
| Sex male/ female (%) | 13 )56.5% (/10 (43.5%) | 14 )60.9%) /9 )39.1%) | 16 )57.1% (/12 )42.9% ( | 1 |
| **Risk factors** (%) | | | | | |
| Hypertension | 18 (78.3%) | 13 )56.5% ( | 18 )64.3% ( | 0.286 |
| Diabetes mellites | 16 (69.6%) | 5 )21.7% ( | 14 )50% ( | 0.004 |
| Atrial fibrillation | 4 )17.4%) | 0 )0% ( | 8 )28.6% ( | 0.013 |
| Ischemic heart disease | 11 )47.8%) | 7 )30.4% ( | 6 )21.4% ( | 0.120 |
| Hyperlipidemia | 16 )69.7% ( | 8 )34.8% ( | 10 )35.7% ( | 0.029 |
| Smoking | 9 )39.1% ( | 7 )30.4% ( | 12 )42.9% ( | 0.691 |
| **Clinical rating scales** | | | | | |
| NIHSS at admission (mean ±SD)  Median (IQR) | 13.17±3.17  14 (6) | 11.17±1.67  11 (2) | 11.61±2.59  12 (6) | 0.037 |
| mRS at admission (mean ±SD)  Median (IQR) | 4.57 ±0.73  5 (1) | 4.22±0.52  4 (1) | 4.29 ±0.85  5 (1.75) | 0.108 |
| **Time passed from onset to procedure in minutes** | | | | | |
| Onset to groin (mean ±SD)  Median (IQR) | 356.90±79.79  360 (100) | - | - |  |
| Onset to revascularization (mean ±SD)  Median (IQR) | 45.81±12.43  45 (21) | - | - |  |
| Onset to door (mean ±SD)  Median (IQR) | - | 136.77±40.57  132.50 (83) | - |  |
| Onset to needle (mean ±SD)  Median (IQR) | - | 56.95±39.43  40 (33) | - |  |

Fisher’s exact test compares numbers and percentages between groups.

The Kraus Kal Wallis test compares means of the three groups.

IQR: interquartile range, n: number of cases, **mRS**: Modified Rankin Scale, **NIHSS**: National Institutes of Health Stroke Scale, **rTPA**: Recombinant Tissue Plasminogen Activator, SD: standard deviation

**Table 2. NIHSS (24hours after treatment) and mRS (3 months after treatment) outcomes among studied groups**

| **Treatment Mode (n)** | **NIHSS at admission** | **NIHSS after 24 hours** | **Wilcoxon Signed Ranks Test for each group** | **Friedman Measure Analysis**  **Time X Group**  **Interaction** | **mRS at admission** | **mRS after 3 months** | **Wilcoxon Signed Ranks Test for each group** | **Friedman Measure Analysis**  **Time X Group**  **Interaction** |
| --- | --- | --- | --- | --- | --- | --- | --- | --- |
| Mechanical thrombectomy (23)  (mean ±SD)  Median (IQR) | 13.17±3.17  14 (6) | 6.32 ± 3.40  5 (6) | <0.0001 | <0.0001 | 4.57 ±0.73  5 (1) | 1.64 ± 1.29  1 (1) | <0.0001 | <0.0001 |
| rTPA (23)  (mean ±SD)  Median (IQR) | 11.17±1.67  11 (2) | 4.57 ± 5.38  4 (5) | 0.001 | 4.22±0.52  4 (1) | 1.35 ± 1.82  1 (2) | <0.0001 |
| Conventional Medical treatment (28)  (mean ±SD)  Median (IQR) | 11.61±2.59  12 (6) | 11.75 ± 3.48  12 (5) | 0.72 | 4.29 ±0.85  5 (1.75) | 3.43 ± 0.96  3 (1) | 0.001 |
| **Kraus Kal Wallis test between groups at each time of assessment** | 0.037 | <0.0001 |  |  | 0.108 | <0.0001 |  |  |

IQR: interquartile range, n: number of cases, **mRS**: Modified Rankin Scale, **NIHSS**: National Institutes of Health Stroke Scale, **rTPA**: Recombinant Tissue Plasminogen Activator, SD: standard deviation

**Table 3. Comparison of the primary outcome (neurological and functional outcomes) among studied groups**

| **Treatment Mode (n)** | **NIHSS, 24 hours after treatment** | **P value**  **Between groups** | **mRS, 3 months** | **P value**  **Between groups** |
| --- | --- | --- | --- | --- |
| **Mechanical thrombectomy versus rTPA** | | | | |
| Mechanical thrombectomy (n = 23)  (mean ±SD)  Median (IQR) | 6.32 ± 3.40  5 (6) | 0.035 | 1.64 ± 1.29  1 (1) | 0.102 |
| rTPA (n = 23)  (mean ±SD)  Median (IQR) | 4.57 ± 5.38  4 (5) | 1.35 ± 1.82  1 (2) |
| **Mechanical thrombectomy versus conventional medical treatment** | | | | |
| Mechanical thrombectomy (n = 23)  (mean ±SD)  Median (IQR) | 6.32 ± 3.40  5 (6) | <0.0001 | 1.64 ± 1.29  1 (1) | <0.0001 |
| Conventional Medical treatment (n = 28)  (mean ±SD)  Median (IQR) | 11.75 ± 3.48  12 (5) | 3.43 ± 0.96  3 (1) |
| **rTPA versus conventional medical treatment** | | | | |
| rTPA (n = 23)  (mean ±SD)  Median (IQR) | 4.57 ± 5.38  4 (5) | <0.0001 | 1.35 ± 1.82  1 (2) | <0.0001 |
| Conventional Medical treatment (n = 28)  (mean ±SD)  Median (IQR) | 11.75 ± 3.48  12 (5) | 3.43 ± 0.96  3 (1) |

The Mann-Whitney Test compares the means of the outcomes (mRS 3 months and NIHSS) between mechanical thrombectomy and rTPA, between mechanical thrombectomy and medical treatment and between rTPA and medical treatment.

IQR: interquartile range, n: number of cases, **mRS**: Modified Rankin Scale, **NIHSS**: National Institutes of Health Stroke Scale, **rTPA**: Recombinant Tissue Plasminogen Activator, SD: standard deviation

**Table 4. Comparison of the secondary outcomes among MT, rTPA, and medical treatment groups**

| **Variable of assessment** | **Mechanical thrombectomy**  **(n = 23)** | **rTPA**  **(n = 23)** | **Conventional medical treatment**  **(n = 28)** | **P value between groups** |
| --- | --- | --- | --- | --- |
| Symptomatic intracerebral hemorrhage (sICH) | 2 (8.7%) | 4 (17.4%) | 7 (25%) | 0.314 |
| Mortality at 3 months follow up | 2 (8.7%) | 1 (4.3%) | 2 (7.1%) | 0,837 |
| Good outcome at 3 months follow-up | 16 (69.6%) | 15 (65.2%) | 2 (7.1%) | < 0.0001 |

Fisher’s exact test compares numbers and percentages between groups.

n: number of cases, **mRS**: Modified Rankin Scale, **NIHSS**: National Institutes of Health Stroke Scale, **rTPA**: Recombinant Tissue Plasminogen Activator

**Table 5. Mechanical Thrombectomy Procedures (mode of thrombectomy, number of trials, and revascularization**

| **Mechanical Thrombectomy Procedures** | **Mode/Grade/Trials** | **Number (%)** |
| --- | --- | --- |
| Mode of Thrombectomy | Stent retrieval | 4 (13%) |
|  | Aspiration | 3 (17.4%) |
|  | Mixed procedure | 16 (69%) |
| Number of Trials | One trial | 1 (4.3%) |
|  | Two trials | 8 (34.8%) |
|  | Three or more trials | 14 (60.9%) |
| Grade of Recanalization (mTICI score) | No or partial recanalization (mTICI 0/1/2a) | 6 (26.1%) |
|  | Successful recanalization (mTICI 2b/3) | 17 (73.9%) |

m**TICI**: Thrombolysis in Cerebral Infarction.
